# Supplementary material for: The global landscape of sequence diversity
Source: PubMed Central journal article supplement (PMC2258180; doi:10.1186/gb-2007-8-11-r238), 2007-11-08
Supplement: gb-2007-8-11-r238-S7.pdf [file gb-2007-8-11-r238-S7.pdf]

(a)

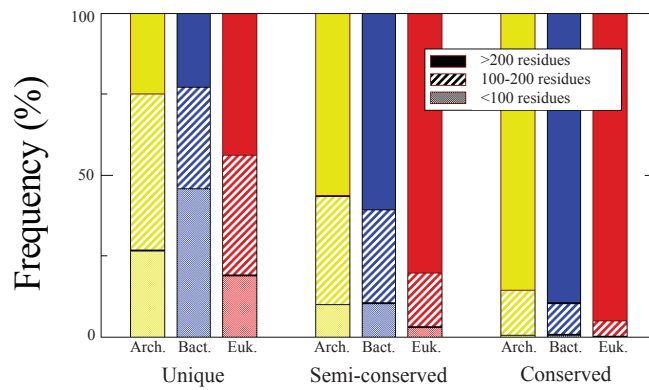

(b)

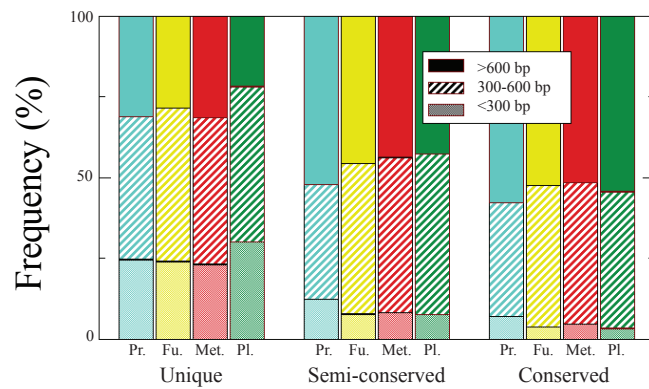

**Figure S5. Relationship between gene conservation and sequence length**

(a) Frequency of genes with particular length distributions for proteins derived from the complete genome datasets. The three major categories represented are: unique (found only in one species); conserved (genes sharing sequence similarity with genes from the other domains of life; and semi-conserved (the rest). Three datasets are shown: Arch. = proteins derived from Archaea; Bact. = Bacteria and Euk. = Eukaryotes. (b) Equivalent analysis for partial eukaryotic genome datasets. Again three categories are represented: unique (found only in one species); conserved (sequences sharing sequence similarity with sequences from plants, metazoa, fungi and protists); and semi-conserved (the rest). Four datasets are presented representing sequences derived from: Pr. - Protists; Fu. - Fungi; Met. - Metazoa; and Pl. - Plants. Since these are based on nucleotides, the sequence lengths are increased three fold to allow a more direct comparison with the analysis of protein sequences in (A).
